# Supplementary material
Source: Springer Nature journal article supplement (https://www.springermedizin.de/resource/supplementary/12936_2007_419_MOESM2_ESM.pdf/9547406)

US and French cases

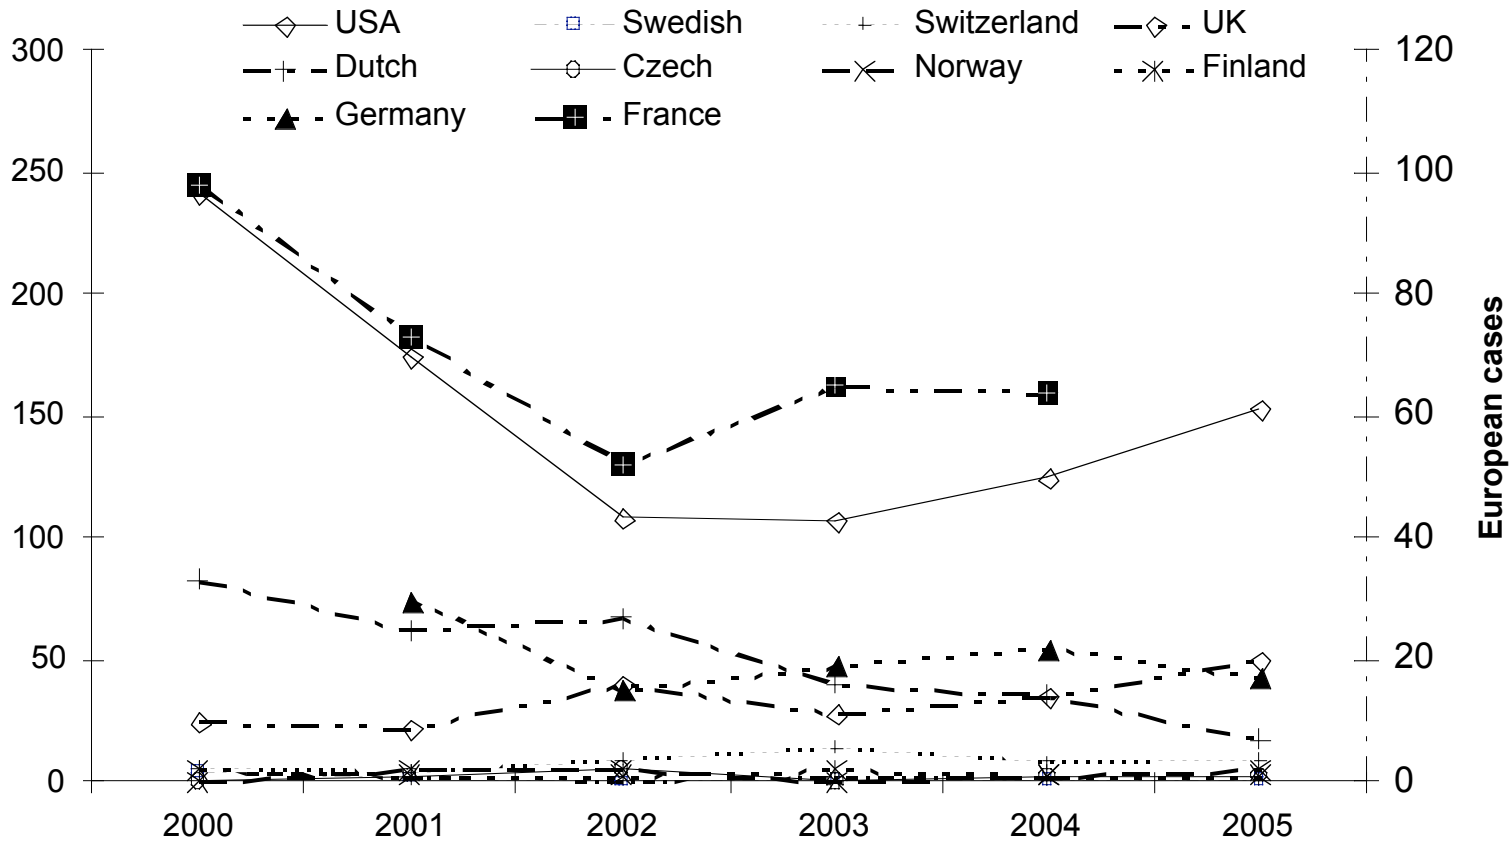

Supplement: MOESM2 [file 9547406]
